# Supplementary material
Source: PubMed Central journal article supplement (PMC7855487)
Supplement: NIHMS1660530-supplement-2.pdf [file NIHMS1660530-supplement-2.pdf]

## Supplemental Information For

### Detergent wash improves vaccinated lymph node handling ex vivo

Alexander G. Ball<sup>a,b</sup>, Maura C. Belanger<sup>b,c</sup>, and Rebecca R. Pompano<sup>b,c,d †</sup>

<sup>a</sup> Department of Microbiology, Immunology and Cancer Biology, University of Virginia, Charlottesville, USA

<sup>b</sup> Carter Immunology Center, University of Virginia, Charlottesville, USA

<sup>c</sup> Department of Chemistry, University of Virginia, Charlottesville, USA

<sup>d</sup> Department of Biomedical Engineering, University of Virginia, Charlottesville, USA

#### Contents

- Supplemental Video Caption
- Supplementary Figures

**Supplementary Video 1:** Movie of washing lymph nodes in digitonin solution. Harvested lymph nodes were quickly dipped into a 100 µg/mL digitonin solution (< 1 sec) before being rinsed in phosphate-buffered saline (3 – 5 sec) and placed into complete RPMI. Movie plays in real time.

Supplementary Figures:

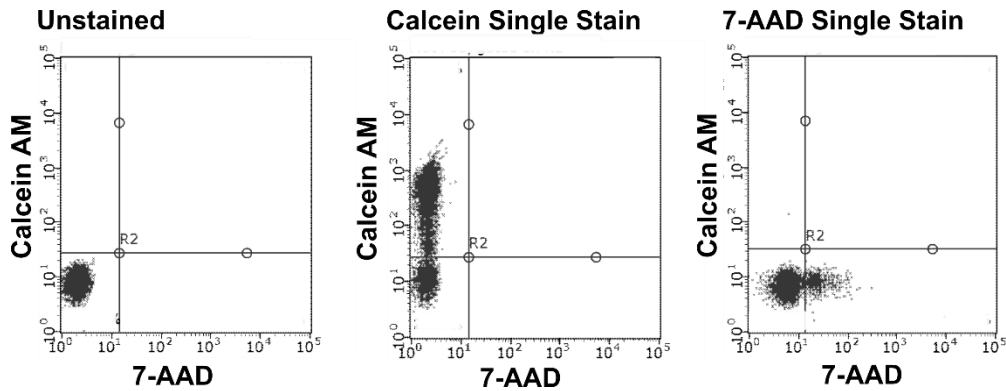

Figure S1: Single stain controls for flow cytometry, as described in Methods.

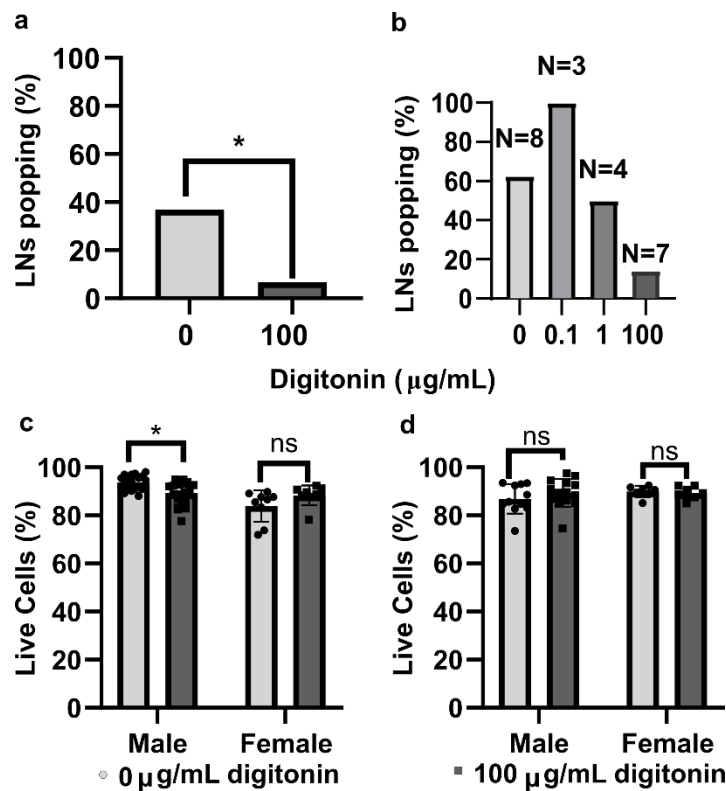

Figure S2: Optimization of digitonin wash and analysis of sex differences in digitonin washing. (a) Popping frequency of LNs from male vaccinated mice with or without digitonin wash.  $n = 16$  for  $0 \mu\text{g/mL}$ ,  $n = 15$  for  $100 \mu\text{g/mL}$ . \* indicates  $p < 0.05$  by unpaired t test. (b) Popping frequencies of LNs from vaccinated animals (male) in preliminary tests with varied concentration of digitonin. (c,d) Overnight viability of lymph node slices with or without a digitonin wash, broken out by sex, for vaccinated mice (c) or naïve mice (d), as assessed by flow cytometry using 7-AAD and Calcein staining. Each dot represents one slice. Bars show mean and standard deviation. \* indicates  $p < 0.05$  by Two-way ANOVA Multiple Comparisons.
